# Supplementary material
Source: Springer Nature journal article supplement (https://www.springermedizin.de/resource/supplementary/12874_2013_1098_MOESM6_ESM.pdf/9433500)

## Simulation Settings

1) higher sensitivity S2=80, C2=90

2) higher specificity S2=70, C2=95

3) lower sensitivity S2=60, C2=90

4) lower specificity S2=70, C2=80

5) both better S2=80, C2=95

6) both worse S2=60, C2=80

7) no better S2=70, C2=90

8) no value S2=70, C2=30

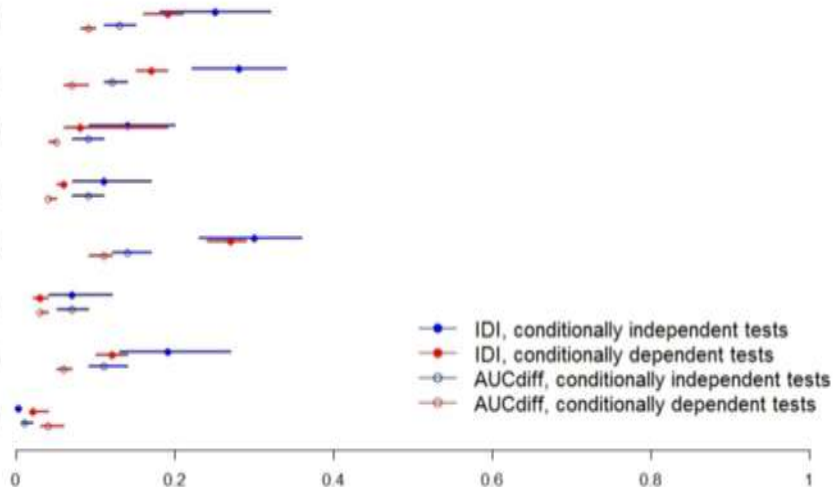

Supplement: MOESM6 [file 9433500]
